# Supplementary material for: Spatio-temporal heterogeneity of riparian soil morphology in a restored floodplain
Source: Copernicus journal article supplement (doi:10.5194/hess-17-4031-2013), 2013-10-17
Supplement: Supplementary file 1 [file hess-17-4031-2013-supplement.pdf]

1 **SUPPLEMENTARY MATERIAL**

2

3 **Table S1.** Occurrences of floods with a frequency equal or superior to two years ( $\geq$   
 4 HQ2) between 1994 and 2007. The dashed line separates the flood events that occurred before the  
 5 restoration from those that occurred after. Forest sites are inundated when river discharge is  
 6 superior or equal to  $630 \text{ m}^3\text{s}^{-1}$  and control pasture sites when superior or equal to  $415 \text{ m}^3\text{s}^{-1}$   
 7 (Samaritani et al. 2011).

| Year | Month | Day | River discharge [ $\text{m}^3\text{s}^{-1}$ ] | HQ  |
|------|-------|-----|-----------------------------------------------|-----|
| 1994 | 5     | 25  | 690                                           | 2   |
| 1994 | 7     | 7   | 680                                           | 2   |
| 1995 | 1     | 26  | 660                                           | 2   |
| 1995 | 6     | 1   | 730                                           | 5   |
| 1995 | 8     | 9   | 570                                           | 2   |
| 1995 | 12    | 25  | 630                                           | 2   |
| 1996 | 7     | 9   | 610                                           | 2   |
| 1999 | 5     | 13  | 1130                                          | 100 |
| 2000 | 8     | 6   | 650                                           | 2   |
| 2000 | 9     | 21  | 710                                           | 2   |
| 2002 | 8     | 12  | 880                                           | 10  |
| 2002 | 9     | 24  | 780                                           | 5   |
| 2004 | 1     | 14  | 768                                           | 5   |
| 2005 | 8     | 23  | 720                                           | 5   |
| 2006 | 3     | 9   | 560                                           | 2   |
| 2006 | 9     | 17  | 717                                           | 5   |
| 2007 | 8     | 9   | 791                                           | 5   |

8

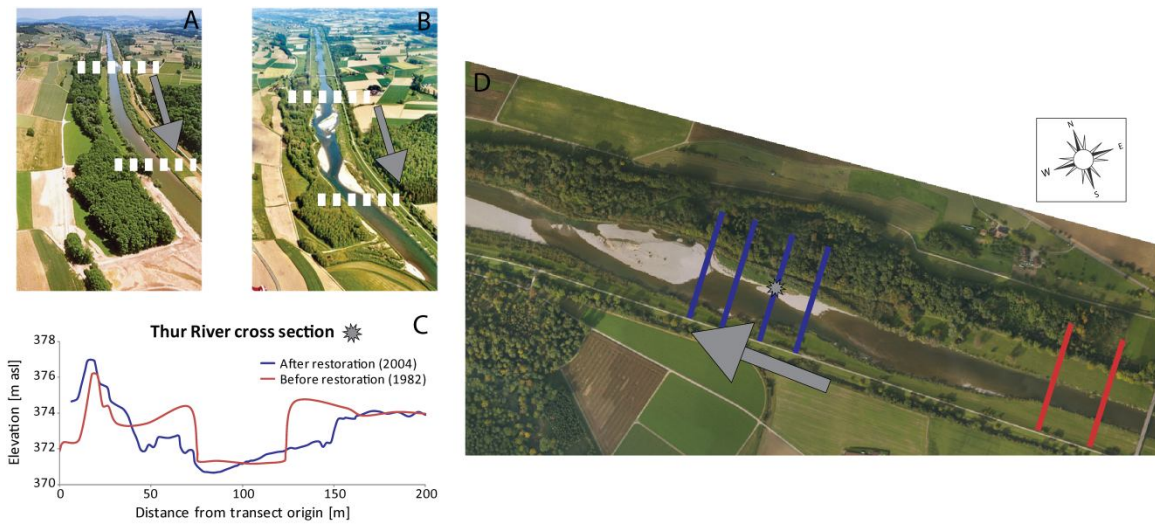

9

10 **Fig. S1.** Illustrations of the restoration of the study site. Panels A and B show the state  
 11 of the site before (June 2001) and after (May 2004) restoration. Panel C provides an example cross  
 12 section of the study site before and after restoration. Panel D shows an aerial view that locates the  
 13 different transects surveyed. The gray arrows indicate river flow direction; and the gray star shows  
 14 the location of the example transect of panel C.

15
